# Supplementary material for: The GaPS2Se2 monolayer: a novel stable 2D Janus semiconductor with anisotropic properties for spontaneous water splitting under the irradiation of solar light
Source: Royal Society of Chemistry journal article supplement (doi:10.1039/d2tc03445j), 2022-01-01
Supplement: d2tc03445j1.pdf [file d2tc03445j1.pdf]

1  
2  
3  
4  
5  
6  
7  
8  
9  
10  
11  
12  
13  
14  
15  
16  
17  
18  
19  
20  
21  
22  
23  
24  
25  
26  
27  
28  
29  
30  
31  
32  
33  
34

## Supporting Information

### GaPS<sub>2</sub>Se<sub>2</sub> Monolayer: Novel Stable 2D Janus Semiconductor with Anisotropic Properties for Spontaneous Water splitting under the Irradiation of Solar Light

*Yuefei Zhang<sup>a</sup>, Xuefei Liu<sup>a,b\*</sup>, Zhen Wang<sup>a\*</sup>, Xihao Chen<sup>c</sup>, Wenjun Xiao<sup>a</sup>, Tianyun Liu<sup>a</sup>, Wei Gong<sup>d\*</sup>,  
Xun Zhou<sup>a\*</sup>, Xianglin Pei<sup>d</sup>, Zhaofu Zhang<sup>e</sup>*

<sup>a</sup>School of physics and electronic science, Guizhou Normal University, Guiyang 550025, China.

<sup>b</sup>Guizhou Provincial Key Laboratory of Computational Nano-Material Science, Guizhou  
Education University, Guiyang 550025, China.

<sup>c</sup>School of Materials Science and Engineering, Research Institute for New Materials and  
Technology, Chongqing University of Arts and Sciences, Chongqing, 402160, China

<sup>d</sup>School of materials and architectural engineering, Guizhou Normal University, Guiyang 550025,  
China.

<sup>e</sup>The Institute of Technological Sciences, Wuhan University, Wuhan 430072, China

35 **Note 1:** Photocatalytic water splitting contains two half-reactions, the oxygen evolution reaction  
 36 (OER) and hydrogen evolution reaction (HER), where the two half-reactions can be obtained based  
 37 on the theory developed by Nørskov et al[1]. That is the adsorption energy difference ( $\Delta G$ ) in the  
 38 water redox reaction, which can be calculated as:

$$39 \quad \Delta G = \Delta E_{DFT} + \Delta ZPE - T\Delta S \quad (S1)$$

40 In which  $\Delta E_{DFT}$  is the adsorption energy obtained from DFT calculation,  $\Delta ZPE$  is the zero-point  
 41 energy,  $T$  is the temperature at 298.15 K and  $\Delta S$  is the entropy difference between the adsorption  
 42 state and gas phase.

43 The OER process is the half-reaction of the photocatalytic water splitting process, where the reaction  
 44 mechanism can be divided into two parts: the acid condition and the alkaline condition. Under acid  
 45 medium, the total reaction is  $2H_2O \rightarrow O_2 + 4H^+ + 4e^-$ , and the reaction is  $4OH^- \rightarrow O_2 + H_2O + 4e^-$ ,  
 46 As for the OER process, there are four elementary steps to transfer  $H_2O$  to  $O_2$ , which could be  
 47 described as following under acid conditions:

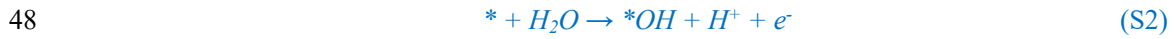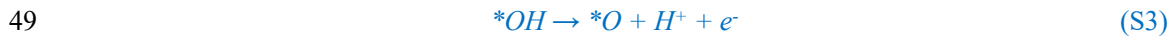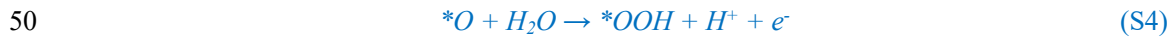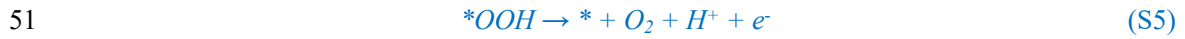

52

53 Where ‘\*’,  $H^+$ , and  $e^-$  are the GaPS<sub>2</sub>Se<sub>2</sub> substrate, proton, and electron respectively. And \*OH, \*O,  
 54 \*OOH are the adsorption intermediate.

55 The corresponding reaction pathway for OER under alkaline condition is described as follow:

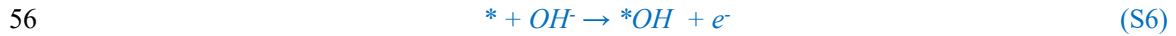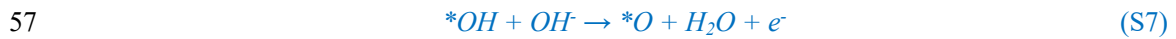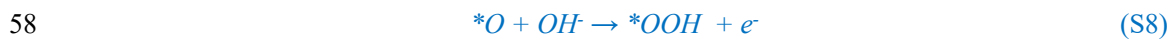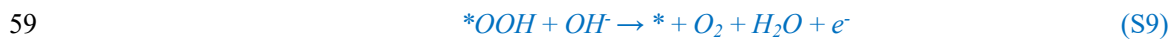

60 Meanwhile, the HER as the other reaction halfway could be summarized as two reaction  
 61 mechanisms, including the Volmer–Heyrovsky and Volmer–Tafel reaction pathways, and both of  
 62 them occur in two steps. Among Volmer–Heyrovsky reaction pathway, the  $H^+$  adsorbed on the  
 63 substrate, then the second  $H^+$  from the solution reacts with first \*H to form the  $H_2$  molecule in the

64 Heyrovsky step under acid condition, and the corresponding reaction equations are as follows:

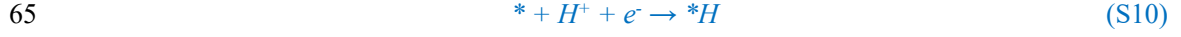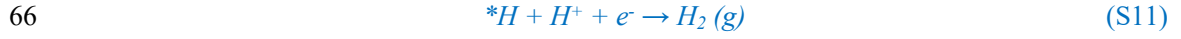

67 Under alkaline solution, the typical HER can be concluded by:

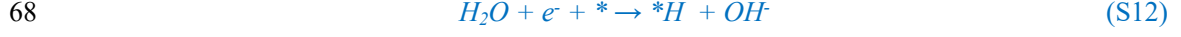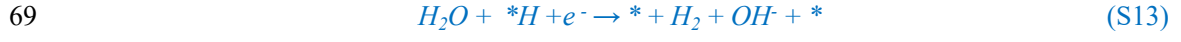

70 And the  $*H$  is the adsorption intermediate. As for the Volmer–Tafel reaction pathways, two H+  
71 adsorbed on the substrate's surface and form an  $H_2$  molecule. Which can be described as follow:

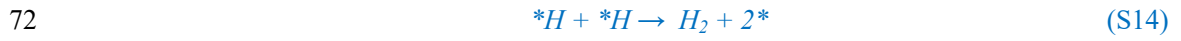

73 For each of the elementary steps, the free energy difference under the effect of PH and an extra  
74 potential bias can be written as:

$$75 \quad \Delta G_1 = G_{*OH} + 1/2 G_{H_2} - G^* - G_{H_2O} + \Delta G_U - \Delta G_{PH} \quad (S15)$$

$$76 \quad \Delta G_2 = G_{*O} + 1/2 G_{H_2} - G_{*OH} + \Delta G_U - \Delta G_{PH} \quad (S16)$$

$$77 \quad \Delta G_3 = G_{*OOH} + 1/2 G_{H_2} - G_{*O} - G_{H_2O} + \Delta G_U - \Delta G_{PH} \quad (S17)$$

$$78 \quad \Delta G_4 = \Delta G^* + 1/2 G_{H_2} - G_{*O_2} - G_{*OOH} + \Delta G_U - \Delta G_{PH} \quad (S18)$$

$$79 \quad \Delta G_5 = G_{*H} - 1/2 G_{H_2} - G^* + \Delta G_U + \Delta G_{PH} \quad (S19)$$

$$80 \quad \Delta G_6 = \Delta G^* + 1/2 G_{H_2} - G_{*H} + \Delta G_U + \Delta G_{PH} \quad (S20)$$

81 Where  $\Delta G_1, \Delta G_2, \Delta G_3,$  and  $\Delta G_4$  belong to the OER process and  $\Delta G_5$  and  $\Delta G_6$  are the HER process.

82 And  $G_{*OH}, \Delta G_U, \Delta G_{PH}, G_{*O}, G_{*OOH}, G_{O_2}, G_{*H},$  and  $G_{H_2}$  are the adsorption free energy of OH, O,

83 OOH, O<sub>2</sub>, H, and H<sub>2</sub>.  $\Delta G_U, \Delta G_{PH}$  is the extra potential bias, energy contribution to different PH

84 concentrations, in which  $\Delta G_{PH} = K_B T \times \ln 10 \times pH, \Delta G_U = -eU$ . The Gibbs free energy of O<sub>2</sub>

85 ( $G_{O_2}$ ) will be obtained by  $G_{O_2} = G_{H_2O} - 2G_{H_2} + 4.92$  eV, because the DFT method fails to

86 accurately describe the high-spin ground state of the O<sub>2</sub> molecule.

87

88

89

90

91

92

93

94

95

96

97

98

99 **Note 2:** As depicted in **Figure.S1**, two bonding sites, namely, site 1 and site 2 are chosen for judging  
100 the bonding nature between Ga and Se, as well as P and Se atoms, respectively. For comparison,  
101 the COHP for GaPS<sub>4</sub> is also considered. Generally, the negative value of COHP under the Fermi  
102 level represents the antibonding state and vice versa. As shown in **Fig.S1**, for the same sites, two  
103 antibonding states are observed in the Ga-S bond in the GaPS<sub>4</sub> system. However, none of the  
104 antibonding states formed in the GaPS<sub>2</sub>Se<sub>2</sub> system for Ga-Se bonds, indicating that the Ga-Se shows  
105 stronger covalent bonds than Ga-S in the GaPS<sub>4</sub> system. However, all the bonding states of P-S/Se  
106 show antibonding states in both GaPS<sub>4</sub> and GaPS<sub>2</sub>Se<sub>2</sub> systems, demonstrating the weak covalent  
107 bonding of P-S/Se.

108

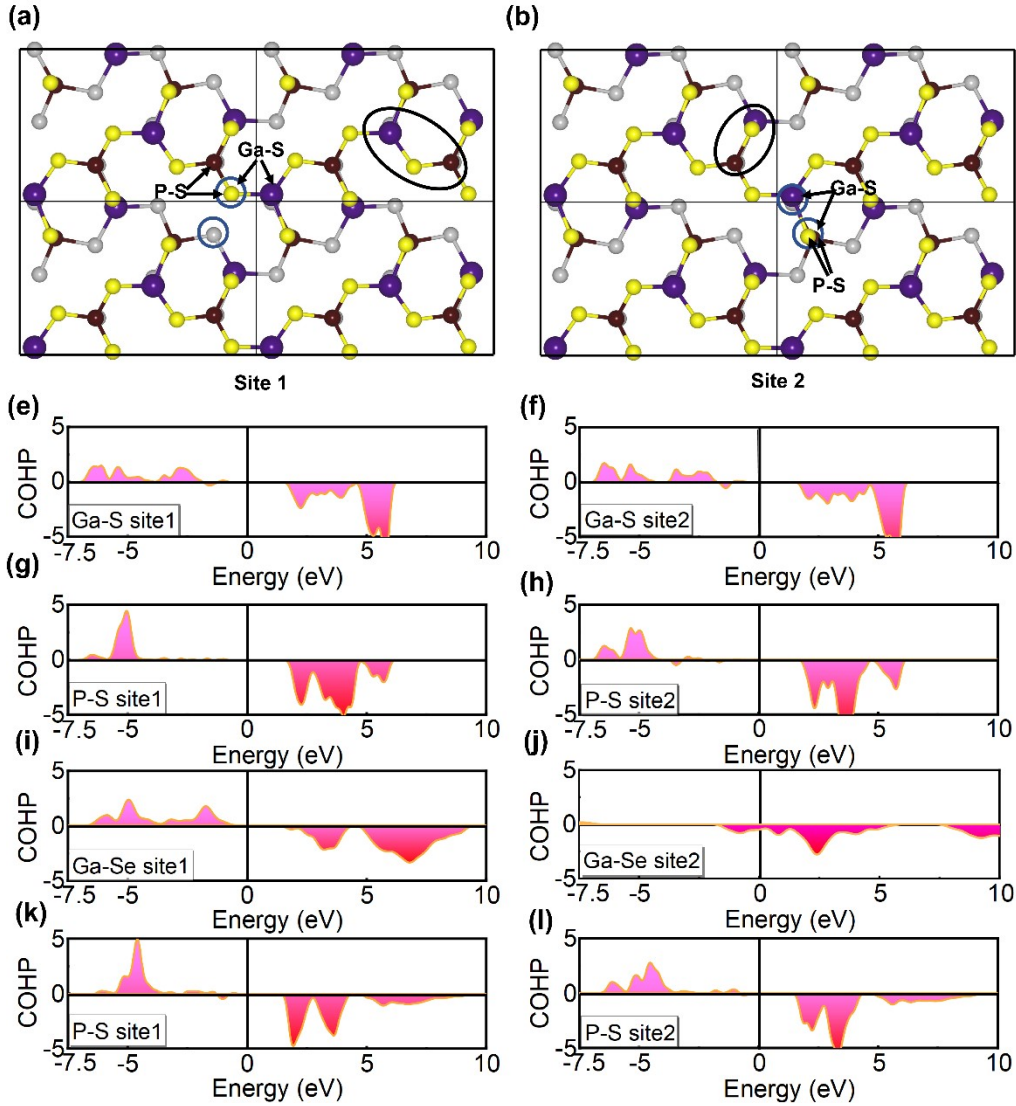

109

110 Figure S1: For the  $\text{GaPS}_4$  and  $\text{GaPS}_2\text{Se}_2$  system, each S/Se atom bonds with one Ga atom and one  
 111 P atom (forming Ga-S-P and Ga-Se-P), respectively. As it can be seen from the geometry, the  
 112 bonding nature between Ga-S-P and Ga-Se-P can be classified into two categories. The one is Ga-  
 113 S-P or Ga-Se-P which is labeled by a black oval in the left figure (the two can be regarded as one  
 114 site since they own similar bonding structures and they can superposition by rotating certain  
 115 angles), we defined it as Site 1 (a). Similarly, the other one is also marked by a black oval (right  
 116 figure), which is defined as Site 2 (b). (e)-(l) is the COHP between them, and the Fermi level is -  
 117 3.44 eV in our calculation, which align at 0 eV for all of them.

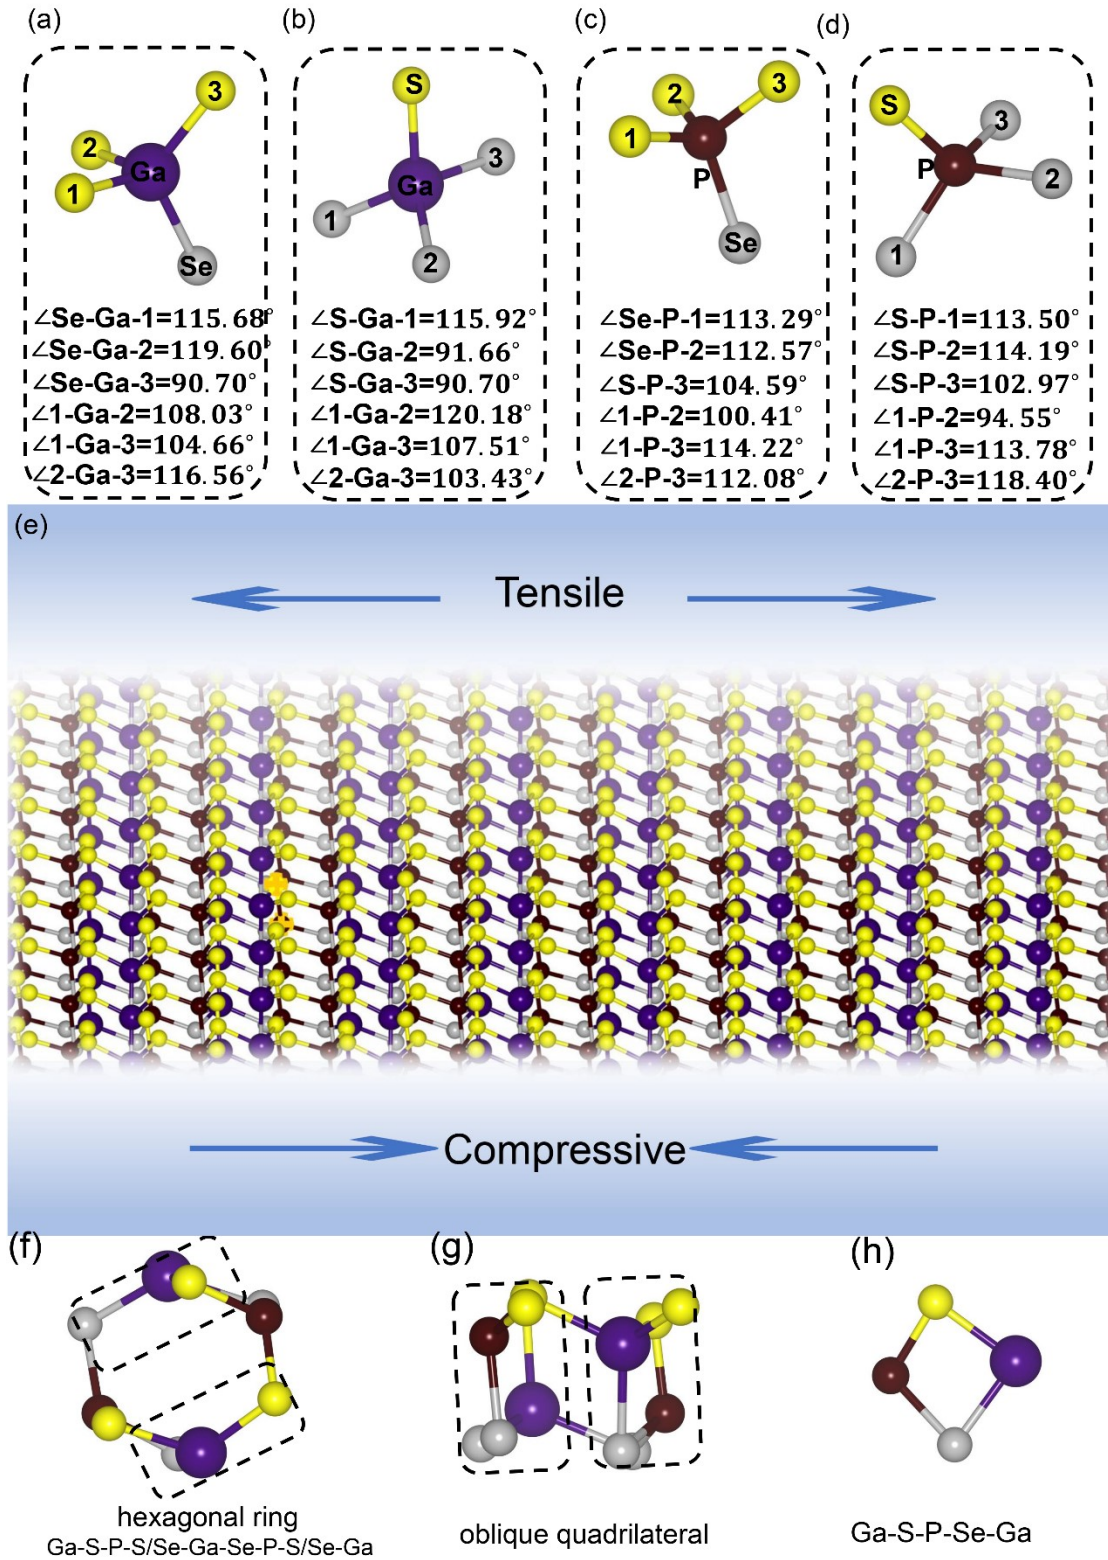

118

119 Figure S2: Atomic structure of  $\text{GaS}_3\text{Se}$  (a),  $\text{GaSSe}_3$  (b),  $\text{PS}_3\text{Se}$  (c),  $\text{PSSe}_3$  (d). The S and Se elements

120 are marked with numbers, and the angles between three atoms are listed as well. (e) The hexagonal

121 ring in the primitive-cell (e), and each of the hexagonal contains two oblique quadrilateral (f), and



122 the structure of oblique quadrilateral (g). (h), (i) The tensile/compression strain applied from the a  
 123 and b direction of the GaPS<sub>2</sub>Se<sub>2</sub> monolayer. and the consistency of strained.  
 124

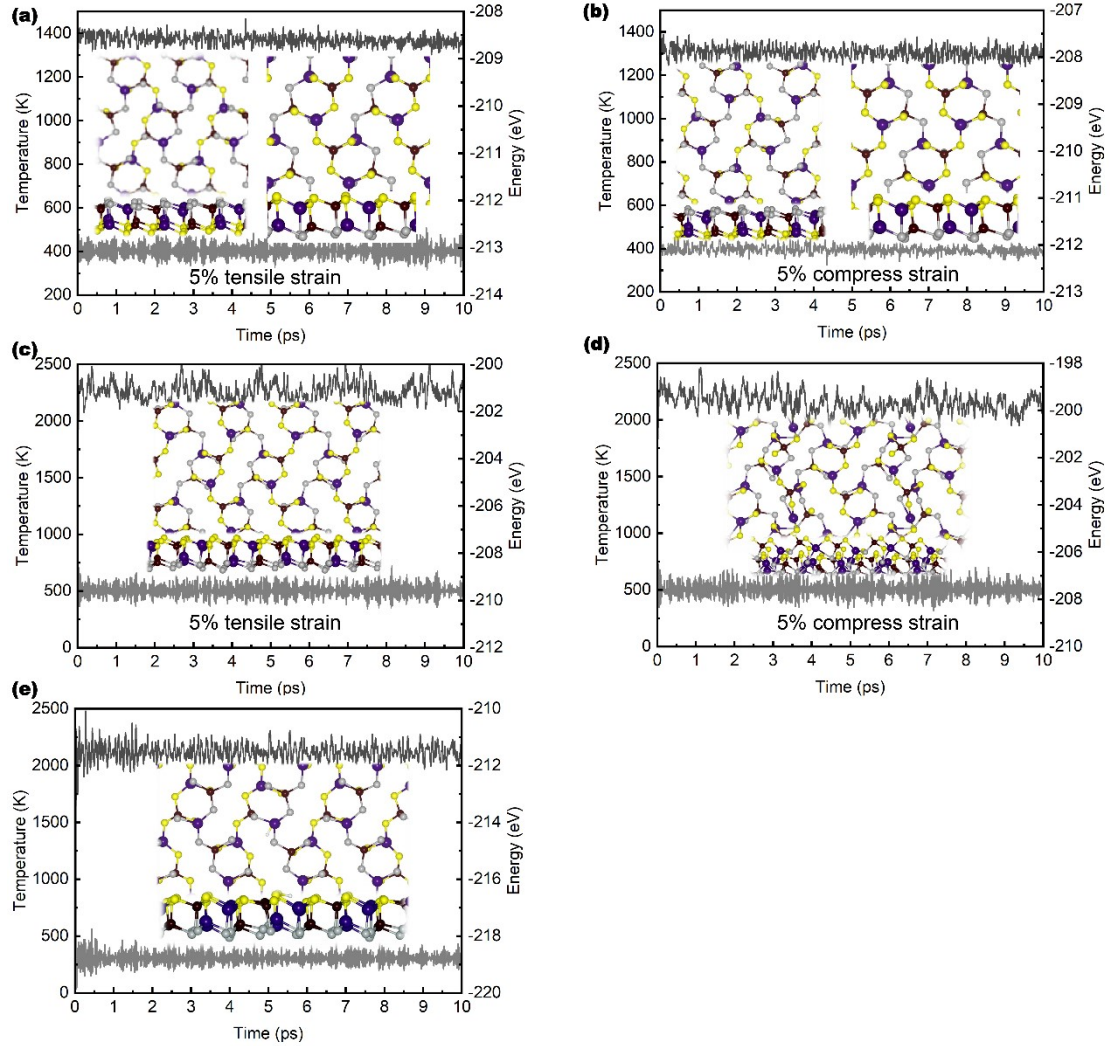

125

126 Figure S3: (a), (b) the AIMD for the applied biaxial strain ( $\pm 5\%$ ) at 400K lasting for 10 ps for the  
 127  $1 \times 2 \times 1$  supercell of GaPS<sub>2</sub>Se<sub>2</sub> monolayer, the inset pictures are the top and side structure of  
 128 GaPS<sub>2</sub>Se<sub>2</sub> after AIMD simulation and optimizing for the simulated structures (c), (d) the AIMD for  
 129 the applied biaxial strain ( $\pm 5\%$ ) at 500K lasting for 10 ps for the  $1 \times 2 \times 1$  supercell of GaPS<sub>2</sub>Se<sub>2</sub>  
 130 monolayer. (e) the AIMD simulation at 300K (To modulate the solvent medium, the temperature is  
 131 set to 300K.) lasted for 10 ps for a  $1 \times 2 \times 1$  supercell.

132

133

134

135 **Note 3:** Calculation of the anisotropic Young's Modulus, Shear Modulus, and Poisson's Rate.

136 The **Hook's law** under the in-plane stress condition was implemented in this paper to explore the  
 137 anisotropic properties of 2D GaPS<sub>2</sub>Se<sub>2</sub>, in which the correlation of stress ( $\sigma$ ), elastic constant tensile  
 138 ( $C_{ij}$ ), and strain  $\varepsilon$  were corrected and expressed as[2]:

$$139 \quad \sigma_{xx} = C_{11}\varepsilon_{xx} + C_{12}\varepsilon_{yy} \quad (S21)$$

$$140 \quad \sigma_{yy} = C_{12}\varepsilon_{xx} + C_{22}\varepsilon_{yy} \quad (S22)$$

$$141 \quad \varepsilon_{zz} = 2C_{66}\varepsilon_{zz} \quad (S23)$$

142 where the standard Voigt notation was implemented to simplify the tensile notation. And the elastic  
 143 constant can be obtained by the following equation[3]:

$$144 \quad E_S = 1/2C_{11}\varepsilon_{xx}^2 + 1/2C_{22}\varepsilon_{yy}^2 + C_{12}\varepsilon_{xx}\varepsilon_{yy} + 2C_{66}\varepsilon_{zz}^2 \quad (S24)$$

145 Here,  $E_S$  is the strain energy, and the tensile strain can be defined as  $\varepsilon = (L_i - L_{i0})/L$  ( $I = x, y$ ), in  
 146 which the  $L_i$  and  $L_{i0}$  is the strained and unstrained lattice constant along the  $x$  and  $y$ -direction with a  
 147 variety from -2% to 2% and a 0.5% increment. Based on this, the orientation-dependent Young's  
 148 Modulus  $E(\theta)$ , Shear Modulus  $G(\theta)$ , and Poisson's Rate  $\nu(\theta)$  can be calculated as[4, 5]:

$$149 \quad E^{-1} = S_{11}\cos^4\theta + S_{22}\sin^4\theta + 2S_{16}\cos^3\theta\sin\theta + 2S_{26}\sin^3\theta\cos\theta + (2S_{12} + S_{66})\cos^2\theta\sin^2\theta \quad (S18)$$

$$150 \quad -\nu(\theta)/E(\theta) = A + B\cos(4\theta + \psi_1) \quad (S25)$$

151 in which

$$152 \quad A = [(S_{11} + S_{22} - S_{66})/2 + 3S_{13}]/4 \quad (S26)$$

$$153 \quad B = \frac{\sqrt{(S_{26} + S_{16})^2 + [S_{12} - (S_{11} + S_{22} - S_{66})/2]^2}}{4} \quad (S27)$$

$$154 \quad \tan \psi_1 = \frac{S_{26} - S_{16}}{S_{12} - (S_{11} + S_{22} - S_{66})/2} \quad (S28)$$

155

$$156 \quad 1/4G(\theta) = C + D\cos(4\theta + \psi_2) \quad (S29)$$

157 Here,  $C$ ,  $D$ , and  $\psi_1$  can be obtained by:

$$158 \quad C = (S_{11} + S_{22} - S_{12} + S_{66})/8 \quad (S30)$$

$$159 \quad D = \frac{\sqrt{(S_{66} + 2S_{12} - S_{11} - S_{22})^2/4 + (S_{26} - S_{16})^2}}{4} \quad (S31)$$

$$160 \quad \tan \psi_2 = \frac{2(S_{16} - S_{26})}{(S_{66} + 2S_{12} - S_{11} - S_{22})} \quad (S32)$$



161 Where  $\theta$  belongs to  $[0 - 2\pi]$ , and  $S_{ij} = C_{ij}$ .

162

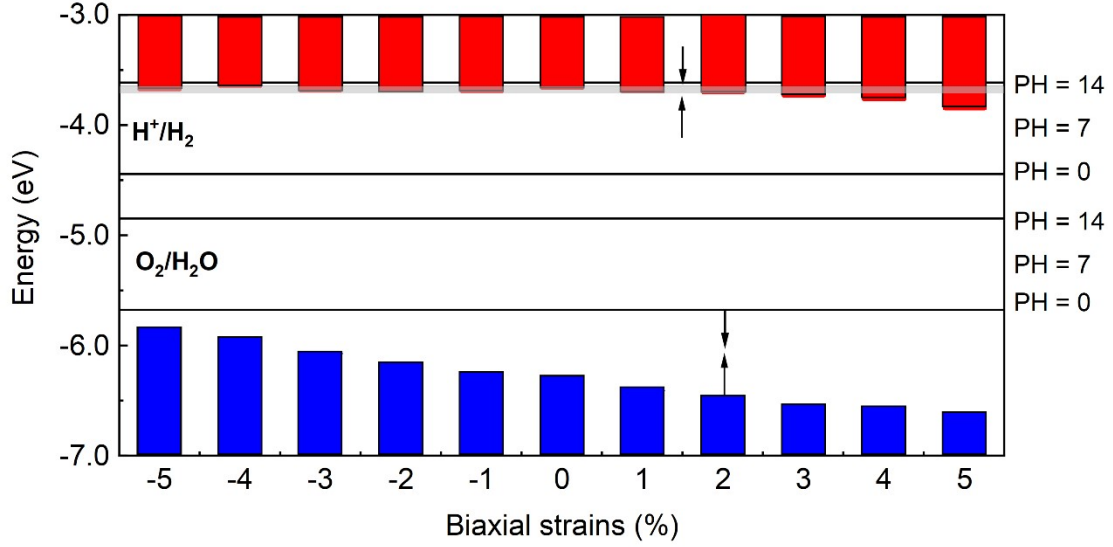

163

164 Figure S4: Strain tunable band edge positions for GaPS<sub>2</sub>Se<sub>2</sub> monolayer under HSE functional

165 (does not consider the external electric field).

166

167 **Note 4:** Thermodynamic Oxidation and Reduction Potentials of GaPS<sub>2</sub>Se<sub>2</sub> Monolayer in Aqueous  
168 Solution

169 To shed light on the thermodynamic stability of the GaPS<sub>2</sub>Se<sub>2</sub> monolayer in an aqueous  
170 solution, the theory developed by Chen[6] was employed in this paper. The reduction of GaPS<sub>2</sub>Se<sub>2</sub>  
171 monolayer by the photo-generated electron can be described by the following formula:

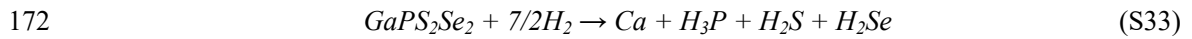

173 Where the Gibbs free energy difference of the productions and the reactants are the thermodynamic  
174 reduction potential of the GaPS<sub>2</sub>Se<sub>2</sub> monolayer ( $\varphi^{re}$ ), which can be calculated by:

$$175 \quad \varphi^{re} = -[\Delta_f G^0(\text{Ga}) + \Delta_f G^0(\text{H}_3\text{P}) + \Delta_f G^0(\text{H}_2\text{S}) + \Delta_f G^0(\text{H}_2\text{Se}) - \Delta_f G^0(\text{GaPS}_2\text{Se}_2) - 7/2\Delta_f G^0(\text{H}_2)]/7eF +$$

$$176 \quad \phi(\text{H}^+/\text{H}_2) \quad (\text{S34})$$

177 in which  $\Delta_f G^0(\text{Ga})$ ,  $\Delta_f G^0(\text{H}_3\text{P})$ ,  $\Delta_f G^0(\text{H}_2\text{S})$ ,  $\Delta_f G^0(\text{H}_2\text{Se})$ ,  $\Delta_f G^0(\text{GaPS}_2\text{Se}_2)$ ,  $\Delta_f G^0(\text{H}_2)$  are the Gibbs free  
178 energy formation of Ga, H<sub>3</sub>P, H<sub>2</sub>S, H<sub>2</sub>Se, and GaPS<sub>2</sub>Se<sub>2</sub>, H<sub>2</sub>, respectively,  $e$  is the electronic charge,  
179  $F$  is the Faradic constant. Among them, the  $\Delta_f G^0(\text{Ga})$ ,  $\Delta_f G^0(\text{H}_3\text{P})$ ,  $\Delta_f G^0(\text{H}_2\text{S})$ ,  $\Delta_f G^0(\text{H}_2\text{Se})$  could be  
180 found in the CRC Handbook of Chemistry and Physics[7], which was concluded in table S1.  
181 Meantime, the Gibbs free energy formation of the GaPS<sub>2</sub>Se<sub>2</sub> ( $\Delta_f G^0(\text{GaPS}_2\text{Se}_2)$ ) is approximated to  
182 the formation energy of GaPS<sub>2</sub>Se<sub>2</sub>, which was defined by:

$$E_{form} = E_{GaPS_2Se_2} - 4E_{Ga} - 4E_P - 8E_S - 8E_{Se} \quad (S35)$$

184 here,  $E_{GaPS_2Se_2}$  could be obtained by DFT calculation, and  $E_{Ga}$ ,  $E_P$ ,  $E_S$ ,  $E_{Se}$  is the chemical potential  
 185 under the most stable state, which is -3.03 eV, -5.41 eV, -4.14 eV, and -3.50 eV, respectively.  
 186 According to our DFT result, the energy value of the  $GaPS_2Se_2$  unit is -105.06 eV, thus the formation  
 187 energy of  $GaPS_2Se_2$  is -0.43 eV per atom eventually according to the above equation. Finally, the  
 188  $\phi^{re}$  was calculated as -0.04 V (vs CHE).

189 The  $GaPS_2Se_2$  monolayer could be oxidized by the photogenerated holes according to the  
 190 following equation.

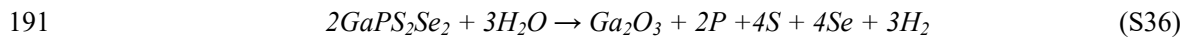

192 similarly, the thermodynamic oxidation potential of the  $GaPS_2Se_2$  monolayer ( $\phi^{ox}$ ), which could be  
 193 defined as follows:

$$\phi^{ox} = [\Delta_f G^0(P) + \Delta_f G^0(Se) + \Delta_f G^0(S) + \Delta_f G^0(Ga_2O_3) - \Delta_f G^0(GaPS_2Se_2) - 3\Delta_f G^0(H_2O)]/6eF + \phi(H^+/H_2) \quad (S37)$$

196 in which  $\Delta_f G^0(P)$ ,  $\Delta_f G^0(Se)$ ,  $\Delta_f G^0(S)$ ,  $\Delta_f G^0(Ga_2O_3)$  are the standard Gibbs free energy of formation  
 197 of P, Se, S, and  $Ga_2O_3$ , which is also found in the CRC Handbook of Chemistry and Physics. By  
 198 implementing the equations above, the calculated value of  $\phi^{ox}$  is 3.56 V (vs NHE), which was plotted  
 199 in Figure 8.

200 Table S1, the Gibbs free energy of each species used in this paper

| Molecular Formula     | $\Delta_f G^0$ | Molecular Formula                  | $\Delta_f G^0$ |
|-----------------------|----------------|------------------------------------|----------------|
| <b>Ga</b>             | 233.7          | <b>H<sub>2</sub>S</b>              | -33.4          |
| <b>P</b>              | 280.1          | <b>H<sub>3</sub>P</b>              | 13.5           |
| <b>S</b>              | 187.0          | <b>H<sub>2</sub>Se</b>             | 15.9           |
| <b>Se</b>             | 236.7          | <b>Ga<sub>2</sub>O<sub>3</sub></b> | -998.3         |
| <b>H<sub>2</sub>O</b> | -237.1         | <b>H<sub>2</sub></b>               | 0              |

201

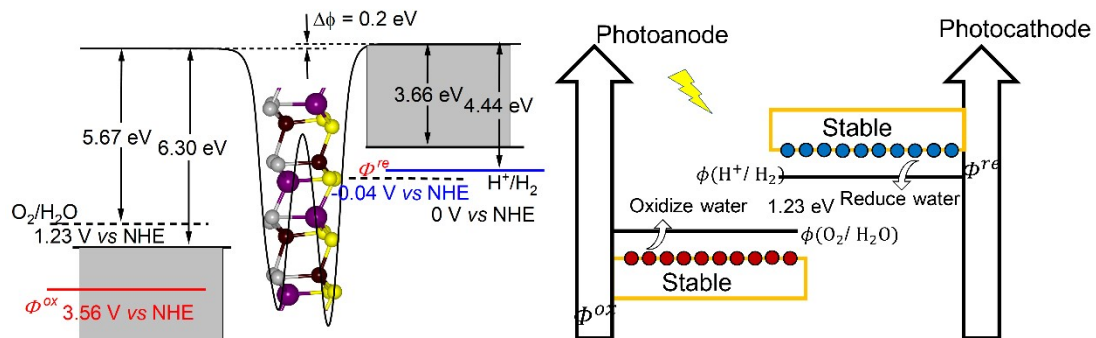

202

203 Figure S5 redox potential of GaPS<sub>2</sub>Se<sub>2</sub> and position of CBM and VBM after aligning with the  
 204 reduction/oxidation potential of water.

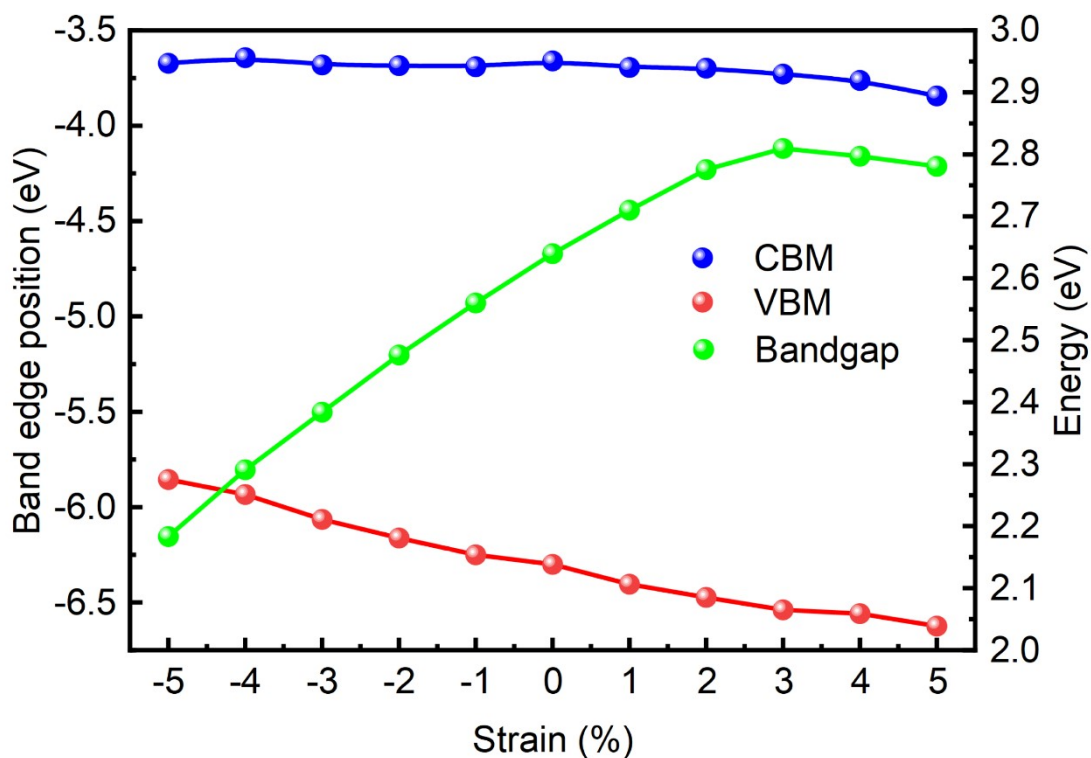

205

206 Figure S6: Variations of CBM, VBM, and bandgap of GaPS<sub>2</sub>Se<sub>2</sub> monolayers with biaxial  
 207 and uniaxial lattice strains from -5% (compression) to 5% (tension).

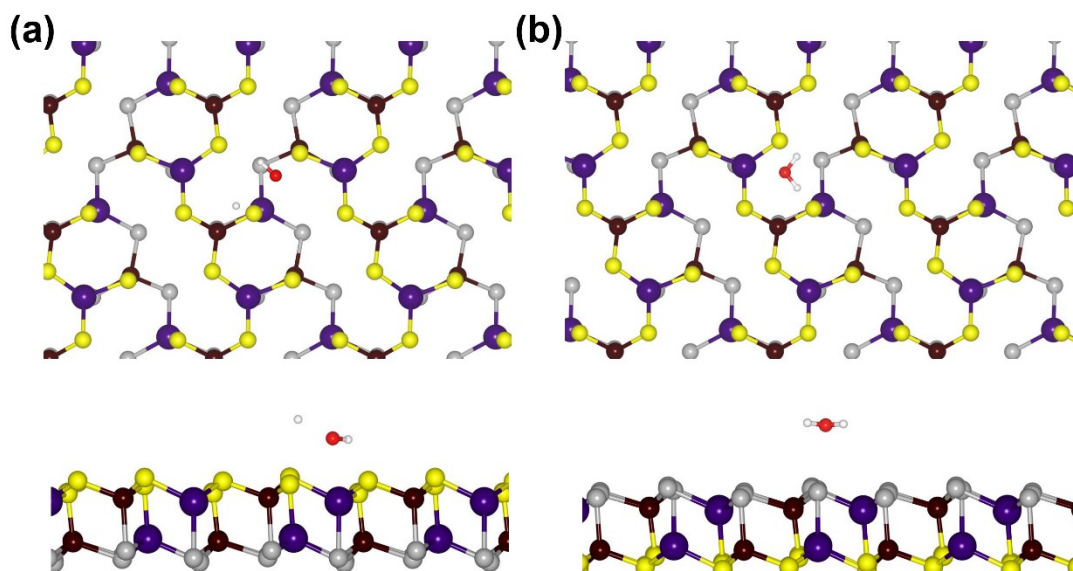

208

209 Figure S7: Top and side views of the adsorption structures of H<sub>2</sub>O molecule on the S (a) and Se (b)  
 210 sides.

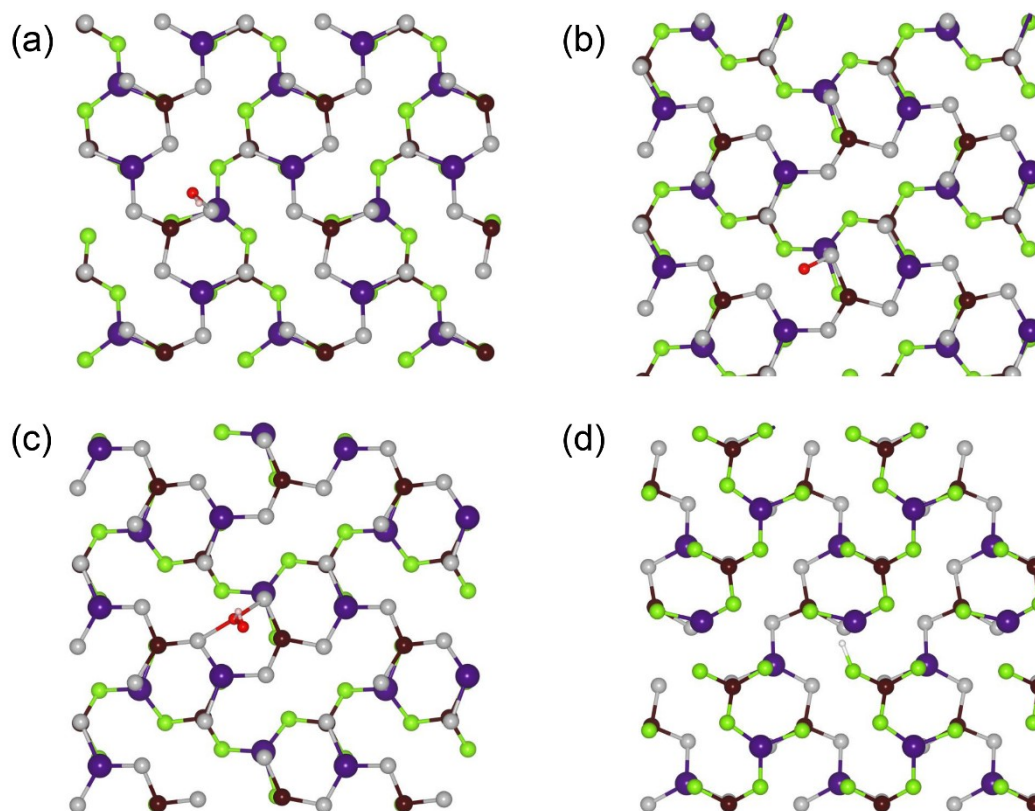

211

212 Figure S8: Structures of the adsorbed species (OH, O, OOH, H) of the applied 2% tensile strain  
 213 system.

214

215 [1] K.S. Novoselov, A.K. Geim, S.V. Morozov, D. Jiang, Y. Zhang, S.V. Dubonos, I.V. Grigorieva, A.A.  
 216 Firsov, Electric field effect in atomically thin carbon films, *Science*, 306 (2004) 666-669.

217 [2] V. Wang, W.T. Geng, Lattice Defects and the Mechanical Anisotropy of Borophene, *J. Phys. Chem.*  
 218 *C*, 121 (2017) 10224-10232.

219 [3] R.C. Andrew, R.E. Mapasha, A.M. Ukpog, N. Chetty, Mechanical properties of graphene and  
 220 boronitrene, *Phys. Rev. B*, 85 (2012) 1-9.

221 [4] S.D. Baranovskii, Theoretical description of charge transport in disordered organic semiconductors,  
 222 *Phys. Status Solidi B*, 251 (2014) 487-525.

223 [5] C. Jasiukiewicz, T. Paszkiewicz, S. Wolski, Auxetic properties and anisotropy of elastic material  
 224 constants of 2D crystalline media, *Phys. Status Solidi B*, 247 (2010) 1247-1247.

225 [6] S. Chen, L.-W. Wang, Thermodynamic Oxidation and Reduction Potentials of Photocatalytic  
 226 Semiconductors in Aqueous Solution, *Chem. Mater.*, 24 (2012) 3659-3666.

227 [7] G. Baysinger, Berger, L. I., Goldberg, R. N., Kehiaian, H. V., & Kuchitsu, K., *CRC handbook of*  
 228 *chemistry and physics.*, (2015) National Institute of Standards and Technology.

229
